# Supplementary material
Source: ML conference proceedings conference paper supplement (https://openreview.net/forum?id=4eZqQ0Qs8u)

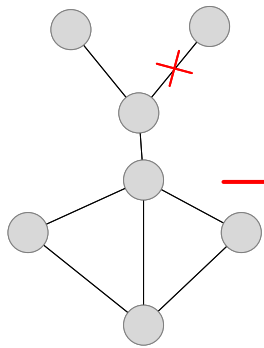

Fault Scenario Graph

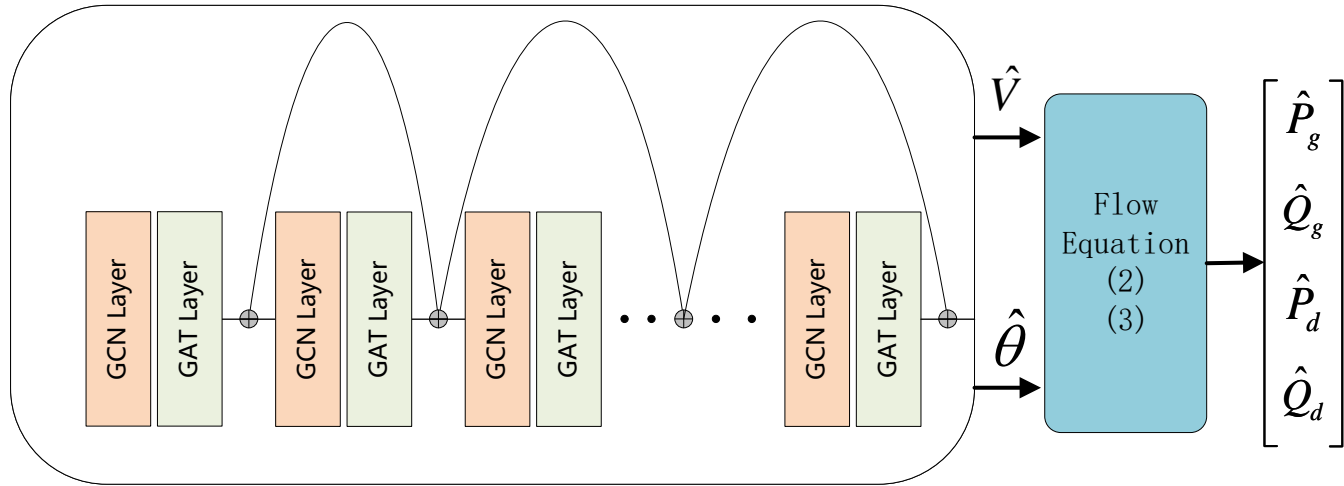

Supplement: supplementary_material [file net.pdf › iclr2026/net.pdf]
